# Supplementary material for: CAR-T cell-mediated depletion of immunosuppressive tumor-associated macrophages promotes endogenous antitumor immunity and augments adoptive immunotherapy
Source: PubMed Central journal article supplement (PMC7873057; doi:10.1038/s41467-021-20893-2), 2021-02-09
Supplement: 41467_2021_20893_MOESM1_ESM.pdf [file 41467_2021_20893_MOESM1_ESM.pdf]

# Supplementary Information

**A**

ID8 ascites

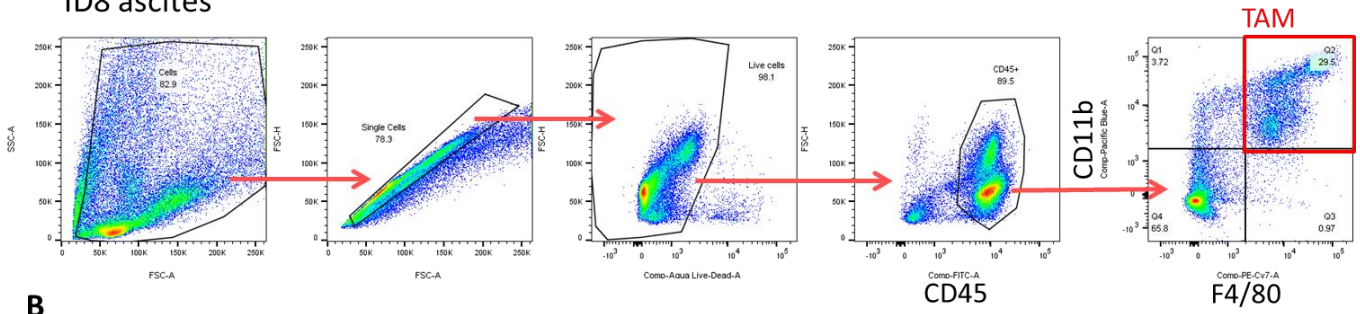

**B**

ID8 ascites

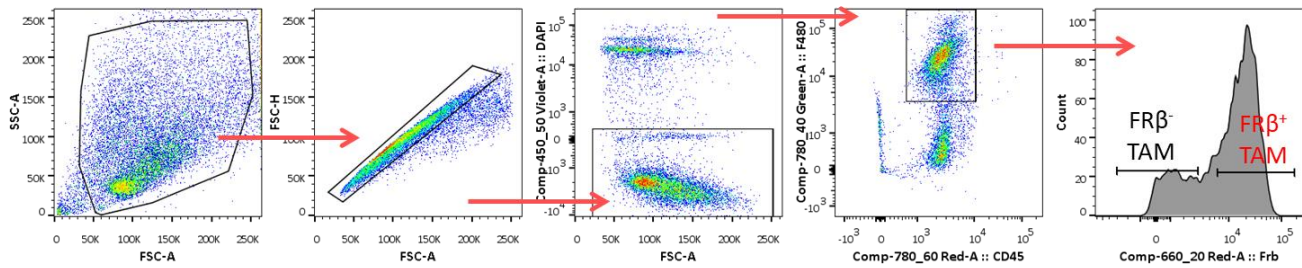

**C**

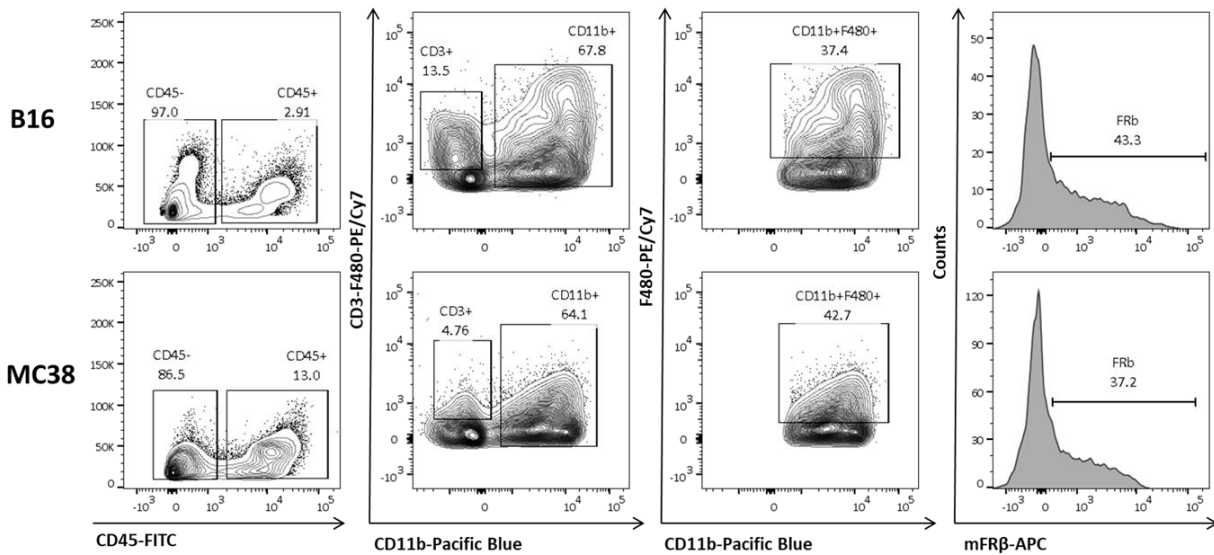

**D**

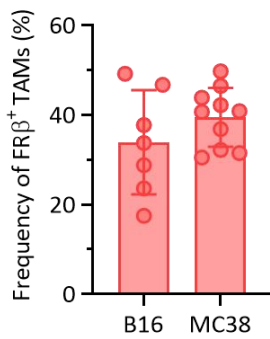

**Supplementary Figure 1. Gating strategy for FACS analysis and sorting of TAMs and FR $\beta$  expression in TAMs from different tumor origins** (A) Gating strategy for peritoneal TAMs from ID8 ovarian tumor-bearing C57BL/6 mice (defined as live/CD45<sup>+</sup>CD11b<sup>+</sup>F4/80<sup>+</sup>). (B) Gating strategy to sort FR $\beta$ <sup>-</sup> and FR $\beta$ <sup>+</sup> TAMs from ID8 ovarian tumor-bearing C57BL/6 mice used for the assays presented in Fig. 2a, b, c, g, h; 3b, c; Supplementary Fig. 4a-f; and Supplementary Fig. 5a-f. (C) C57BL/6 mice were implanted subcutaneously (s.c.) with 0.5x10<sup>6</sup> B16 melanoma or MC38 colon adenocarcinoma cells. 14 days later, tumors were collected, mechanically dissociated and analyzed by FACS. Representative gating strategy and FR $\beta$  expression in TAMs (defined as live/CD45<sup>+</sup>CD11b<sup>+</sup>F4/80<sup>+</sup>) from B16 (upper panel) or MC38 (lower panel) (D) Frequency of FR $\beta$ <sup>+</sup> TAMs is represented as mean  $\pm$  SD (B16 n=7 tumors, MC38 n=10 tumors). Source data are provided as a Source Data file.

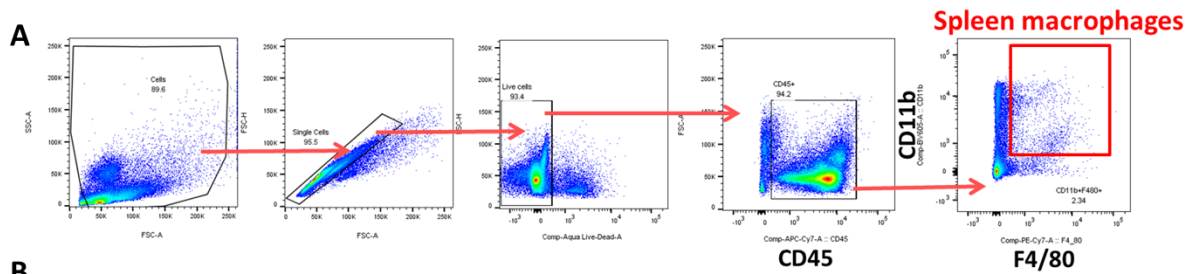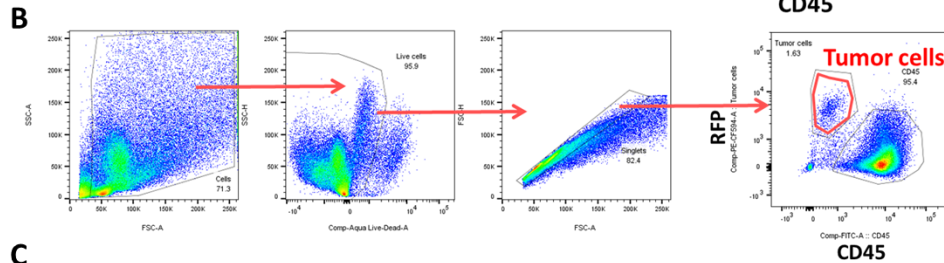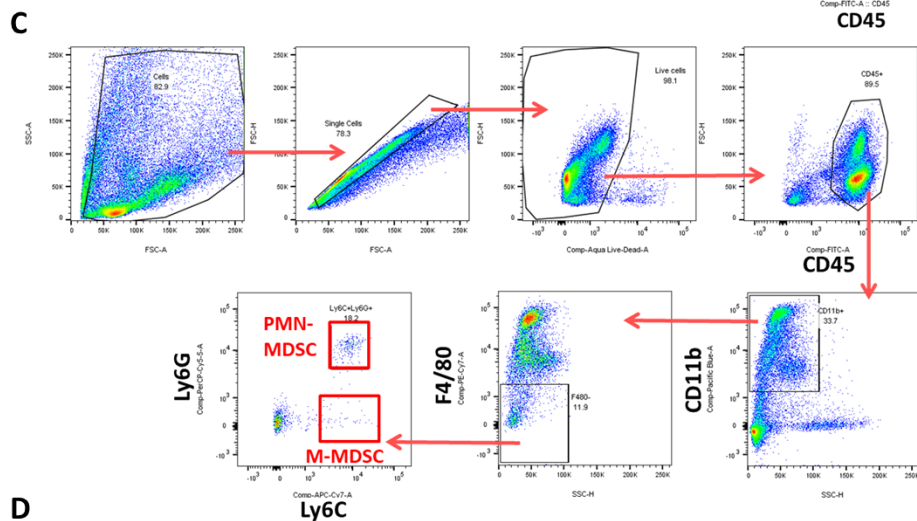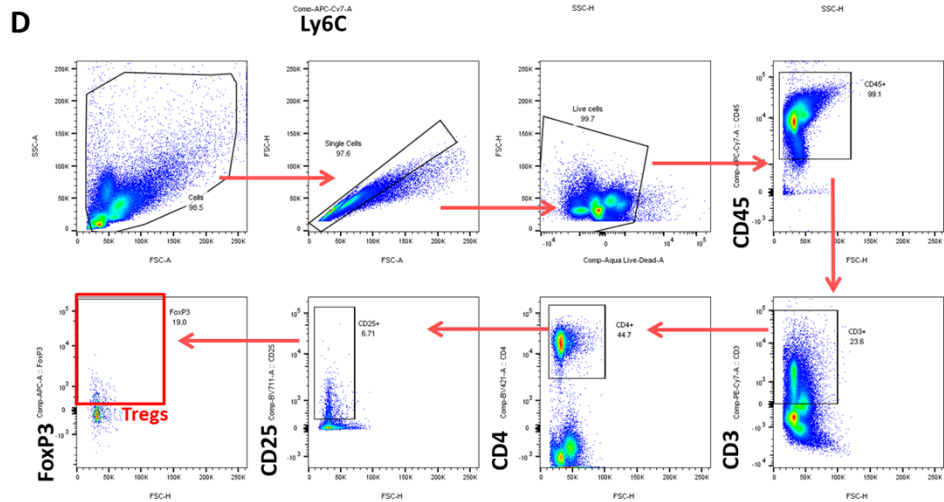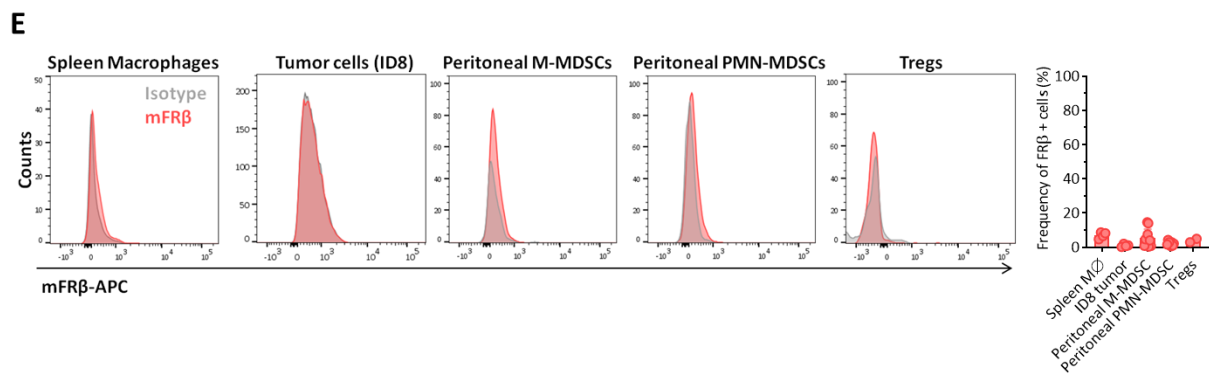

**Supplementary Figure 2. Gating strategy for FACS analysis and FR $\beta$  expression in the TME.** Representative gating strategies shown for (A) spleen macrophages (defined as live/CD45<sup>+</sup>CD11b<sup>+</sup>F4/80<sup>+</sup>), (B) peritoneal ID8 tumor cells (defined as live/CD45-RFP<sup>+</sup>) (C) peritoneal monocytic myeloid-derived suppressor cells (M-MDSCs) (defined as live/CD45<sup>+</sup>CD11b<sup>+</sup>F4/80<sup>-</sup>Ly6C<sup>+</sup>Ly6G<sup>-</sup>) and polymorphonuclear (PMN)-MDSCs (defined as live/CD45<sup>+</sup>CD11b<sup>+</sup>F4/80<sup>-</sup>Ly6C<sup>+</sup>Ly6G<sup>+</sup>), and (D) regulatory T cells (Tregs). (E) FR $\beta$  expression in macrophages obtained from spleen, ID8 tumor cells, peritoneal MDSCs, and Tregs. Representative histograms (grey-isotype, red-anti-mFR $\beta$ , left panel) and frequency of FR $\beta$ <sup>+</sup> cells (right panel)  $\pm$  SD (Spleen and ID8 n=4 mice, M-MDSCs n=10 mice, PMN-MDSCs n= 8 mice, Tregs n=3 mice) are shown. Source data are provided as a Source Data file.

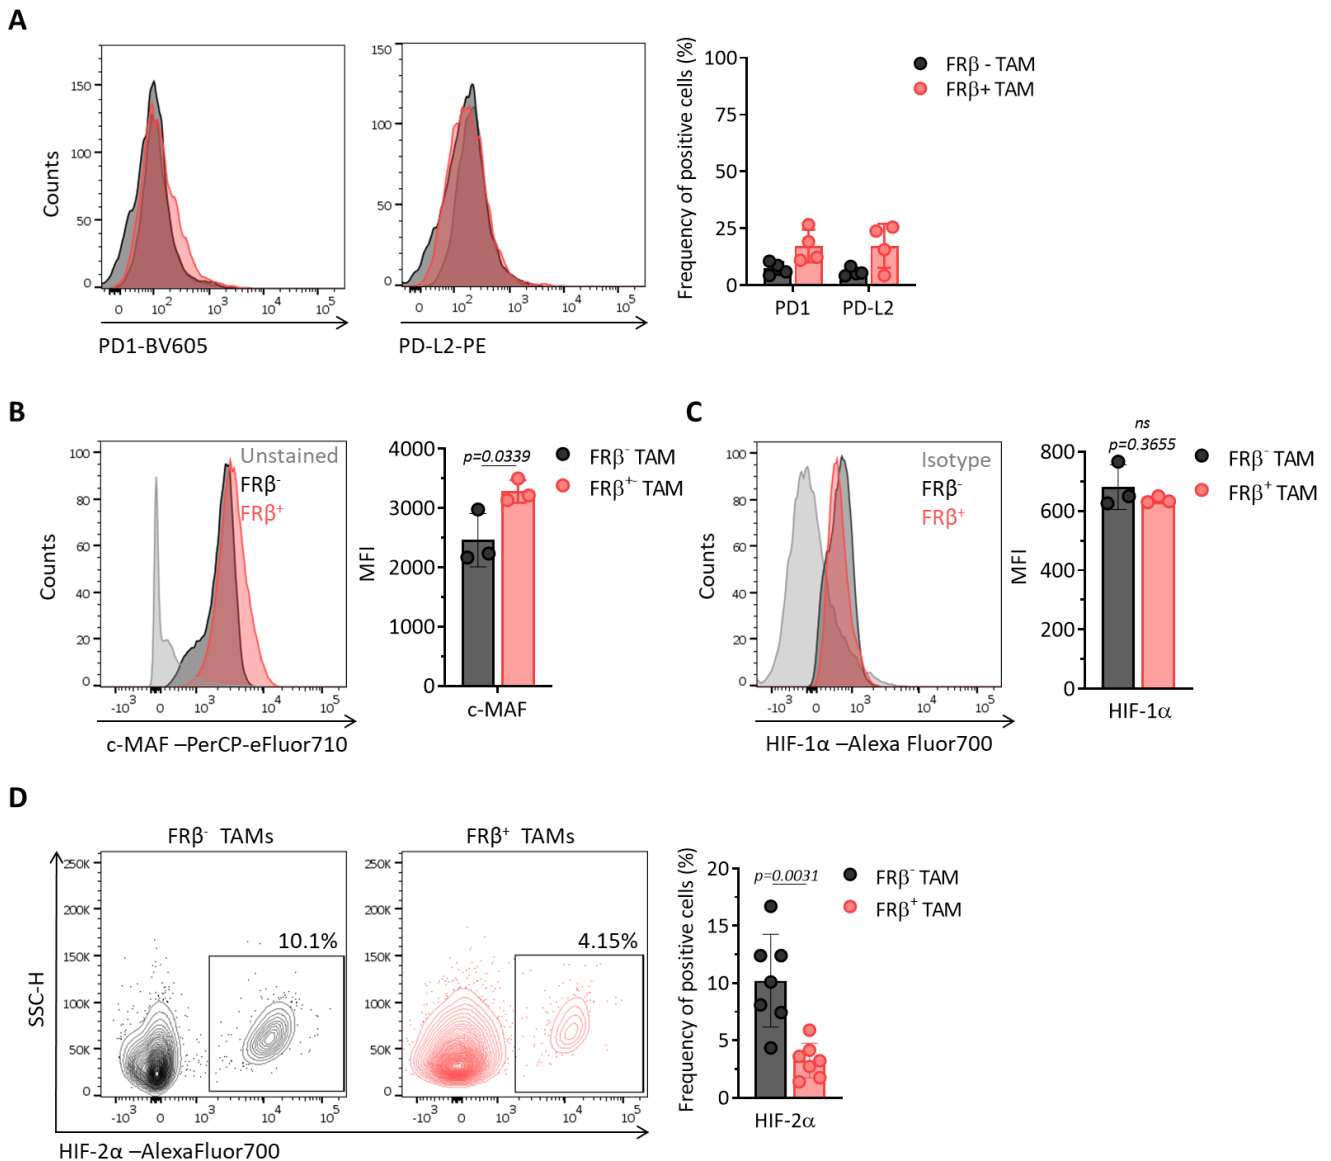

**Supplementary Figure 3. Phenotypic characterization of FRβ<sup>+</sup> TAMs.** (A) Expression of checkpoint immune molecules in TAMs. Expression of PD1 and PD-L2 in FRβ<sup>-</sup> and FRβ<sup>+</sup> TAMs (gated on live, CD45<sup>+</sup>CD11b<sup>+</sup>F4/80<sup>+</sup>). Representative histograms (grey-isotype, black-FRβ<sup>-</sup> TAMs, red-FRβ<sup>+</sup> TAMs, left and middle panel) are shown. Frequencies of positive cells are represented as mean ± SD (n=4 mice, right panel). (B) Expression of c-MAF in FRβ<sup>-</sup> and FRβ<sup>+</sup> TAMs as detected by flow cytometry. Representative histograms (grey-unstained, black-FRβ<sup>-</sup> TAMs, red-FRβ<sup>+</sup> TAMs, left panel) and MFI (right panel) ± SD (n=3 mice) are shown. (C) Expression of HIF-1α in FRβ<sup>-</sup> and FRβ<sup>+</sup> TAMs as detected by flow cytometry. Representative histograms (grey-isotype, black-FRβ<sup>-</sup> TAMs, red-FRβ<sup>+</sup> TAMs, left panel) and MFI (right panel) ± SD (n=3 mice) are shown. (D) Expression of HIF-2α in FRβ<sup>-</sup> and FRβ<sup>+</sup> TAMs. Representative flow plots are shown (left and middle panel) and frequencies of positive cells are represented as mean ± SD (n=7 mice, right panel). *p*-values by a paired two-tailed t-test are indicated. Source data are provided as a Source Data file.

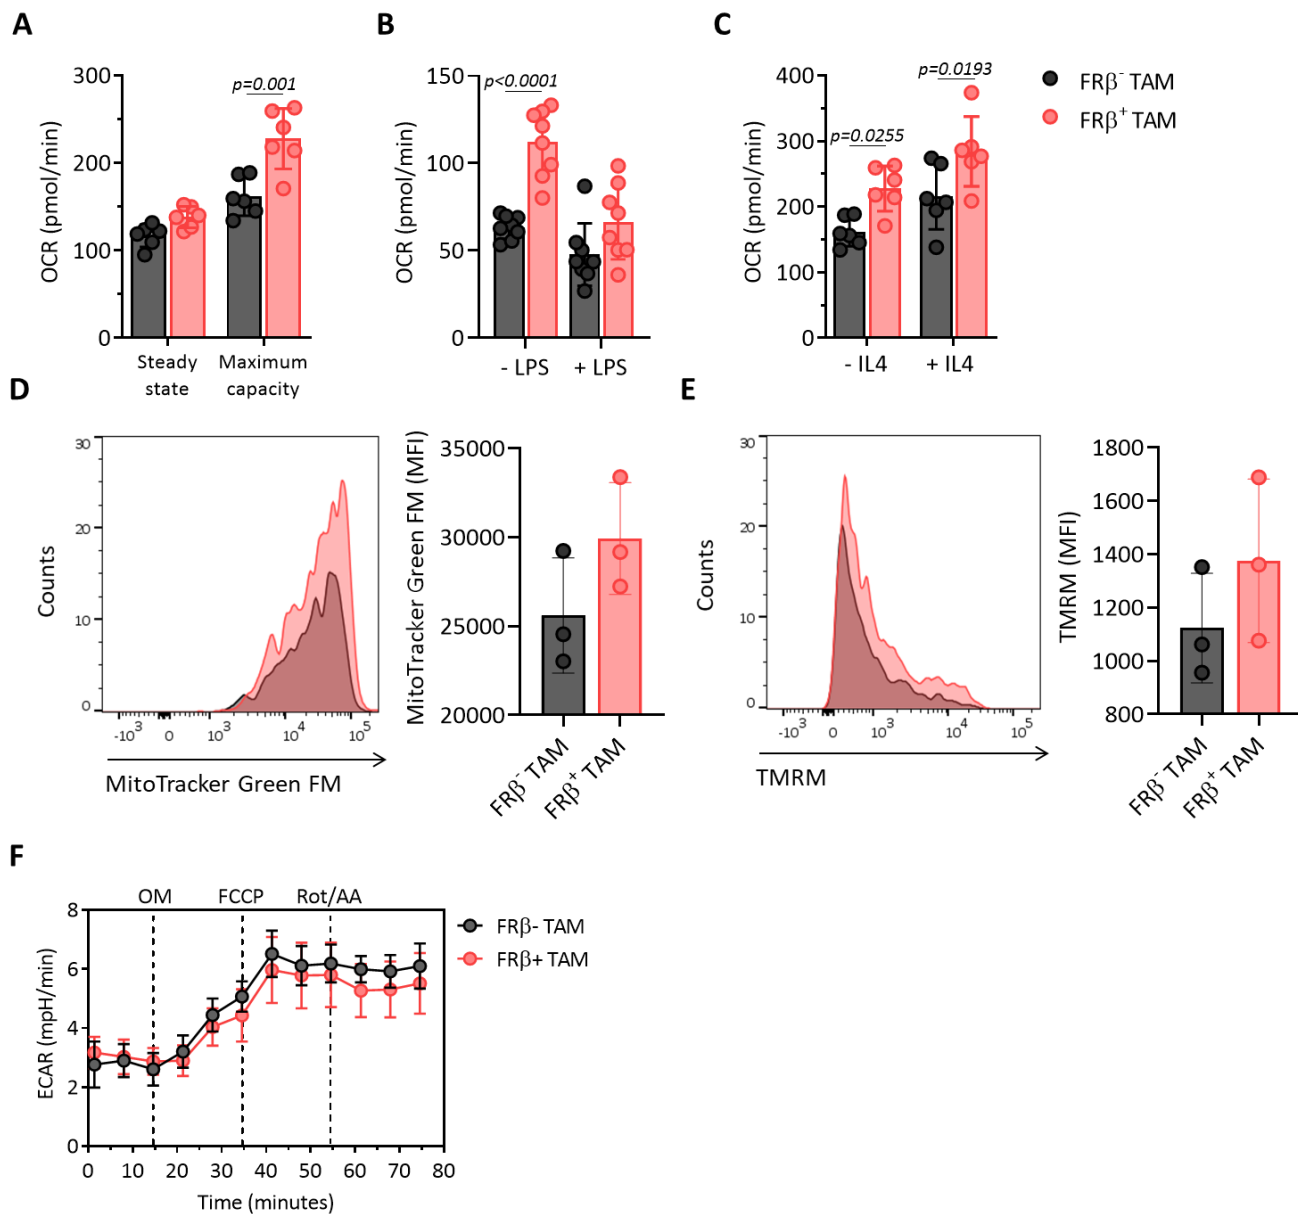

**Supplementary Figure 4. Metabolic differences between FR $\beta$ <sup>-</sup> and FR $\beta$ <sup>+</sup> TAMs.** (A) Oxygen Consumption Rates (OCR) of flow-sorted FR $\beta$ <sup>-</sup> and FR $\beta$ <sup>+</sup> TAMs after one day in culture in response to mitochondrial inhibitors added at indicated times as detected by a Seahorse assay. Basal OCR and maximum respiratory levels are represented as mean  $\pm$  SD (n=6 replicates). (B) Maximum Oxygen Consumption Rates (OCR) of flow-sorted FR $\beta$ <sup>-</sup> and FR $\beta$ <sup>+</sup> TAMs after one day in culture in the presence or absence of 5ng/mL LPS (n=8) or (C) 20ng/mL mL-4. Mean  $\pm$  SD (n=6 replicates) is represented. Representative of two independent experiments. Intensity of (D) MitoTracker Green FM fluorescence and (E) tetramethylrhodamine, methyl ester (TMRM) as determined by flow cytometry in FR $\beta$ <sup>-</sup> and FR $\beta$ <sup>+</sup> TAMs (gated on live, CD45<sup>+</sup>CD11b<sup>+</sup>F4/80<sup>+</sup>). Representative histograms (black-FR $\beta$ <sup>-</sup> TAMs, red-FR $\beta$ <sup>+</sup> TAMs, left panel) and MFI are represented as mean  $\pm$  SD (n=3 replicates, right panel). (F) Extracellular acidification rates (ECAR) of flow-sorted FR $\beta$ <sup>-</sup> and FR $\beta$ <sup>+</sup> TAMs after one day in culture in response to mitochondrial

inhibitors added at indicated times as detected by a Seahorse assay represented as mean  $\pm$  SD (n=6 replicates). *p-values* by a two-way ANOVA with Sidak's multiple comparison test are indicated. Source data are provided as a Source Data file.

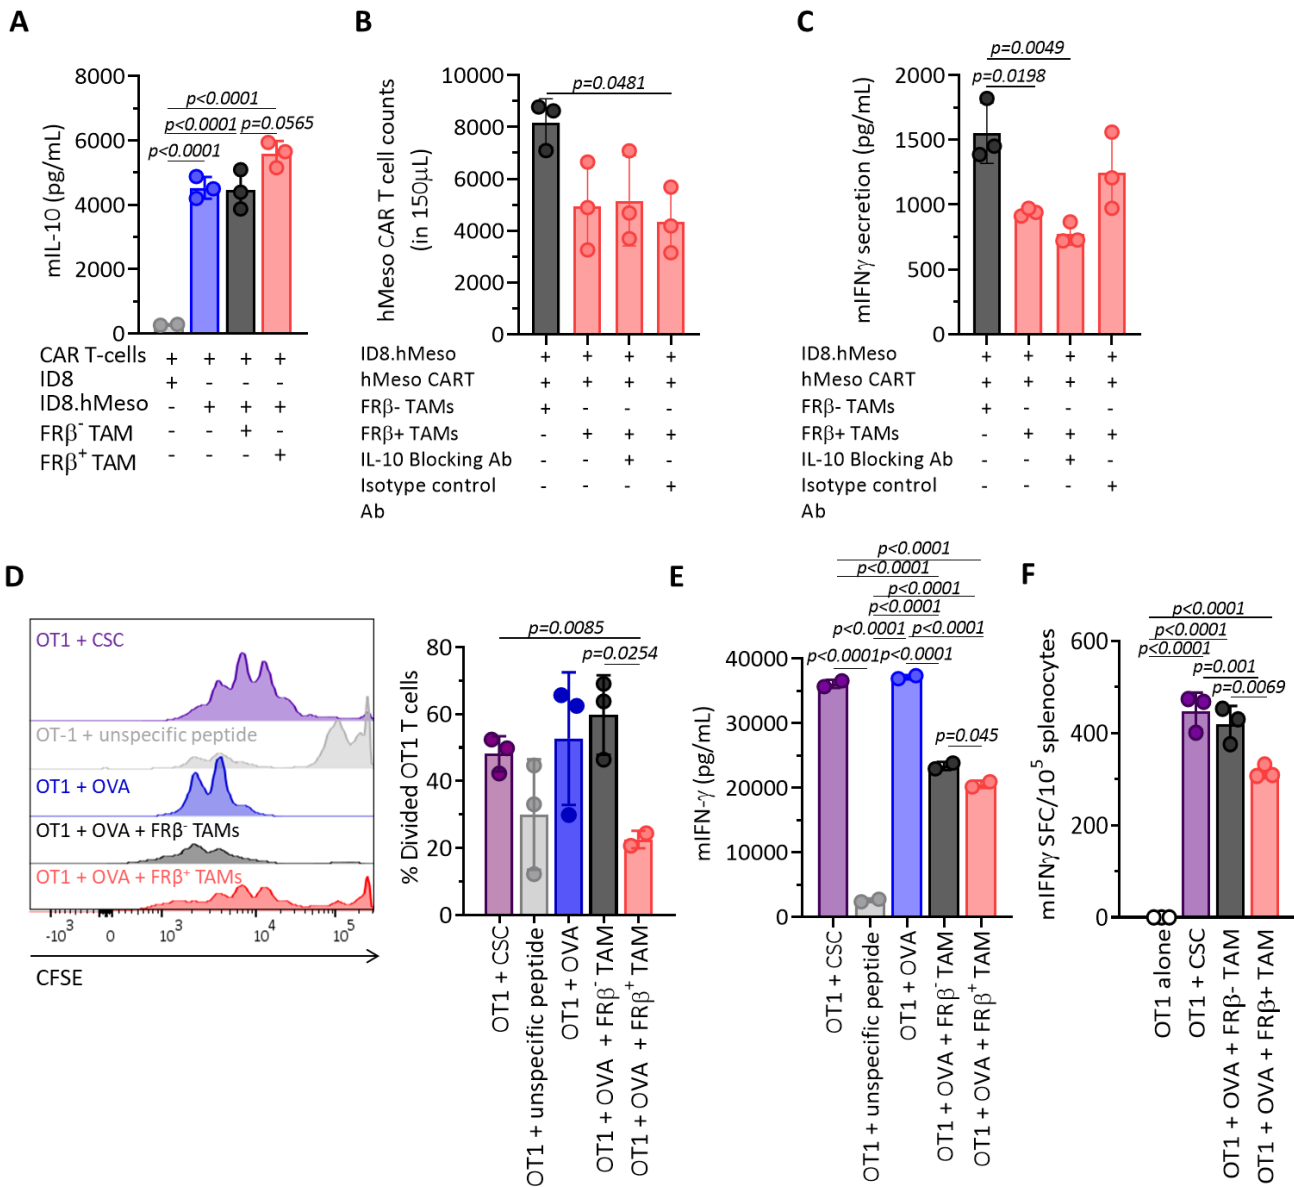

**Supplementary Figure 5. FRβ<sup>+</sup> TAMs suppress antigen-specific T cell responses.** (A) hMeso-specific mouse CAR-T cells were co-cultured with ID8 or ID8.hMeso target cells in the presence of flow-sorted FRβ<sup>-</sup> or FRβ<sup>+</sup> TAMs for 72 hours. mIL-10 levels in 72 hour supernatants as detected by ELISA. Mean ± SD of triplicates is shown. (B-D) hMeso-specific mouse CAR-T cells were co-cultured with ID8.hMeso target cells and flow-sorted FRβ<sup>-</sup> or FRβ<sup>+</sup> TAMs in the presence of mIL-10R blocking antibody or the appropriate isotype control for 72 hours. (B) hMeso CAR-T cell counts at the end of the experiment are represented ± SD of triplicates. (C) mIFN-γ in 72 hour supernatants as detected by ELISA. Mean ± SD of triplicates is shown. (D-F) OVA-specific OT-1 bulk splenocytes labeled with CFSE (a fluorescent dye that is diluted with cell proliferation) were cultured in the presence of specific OVA<sub>257-264</sub> or unspecific peptides at 1μM for 72 hours. (D) Histograms showing CFSE staining on T cells (gated on live/CD3<sup>+</sup> cells, left panel) as well as mean percentages of divided cells ± SD, representative from two independent experiments (right panel, n=3 replicates) are shown. (E) mIFN-γ secretion by OT-



1 T cells as detected by ELISA. Mean  $\pm$  SD of duplicates is represented. (F) Number of mIFN- $\gamma$ -producing cells after overnight co-culture as assessed by ELISPOT assay. Mean  $\pm$  SD is represented (n=3 replicates). Representative data of two independent experiments. (A-F) *p-values* by a one-way ANOVA with Tukey's multiple comparison test are indicated. CSC, cell stimulation cocktail. Source data are provided as a Source Data file.

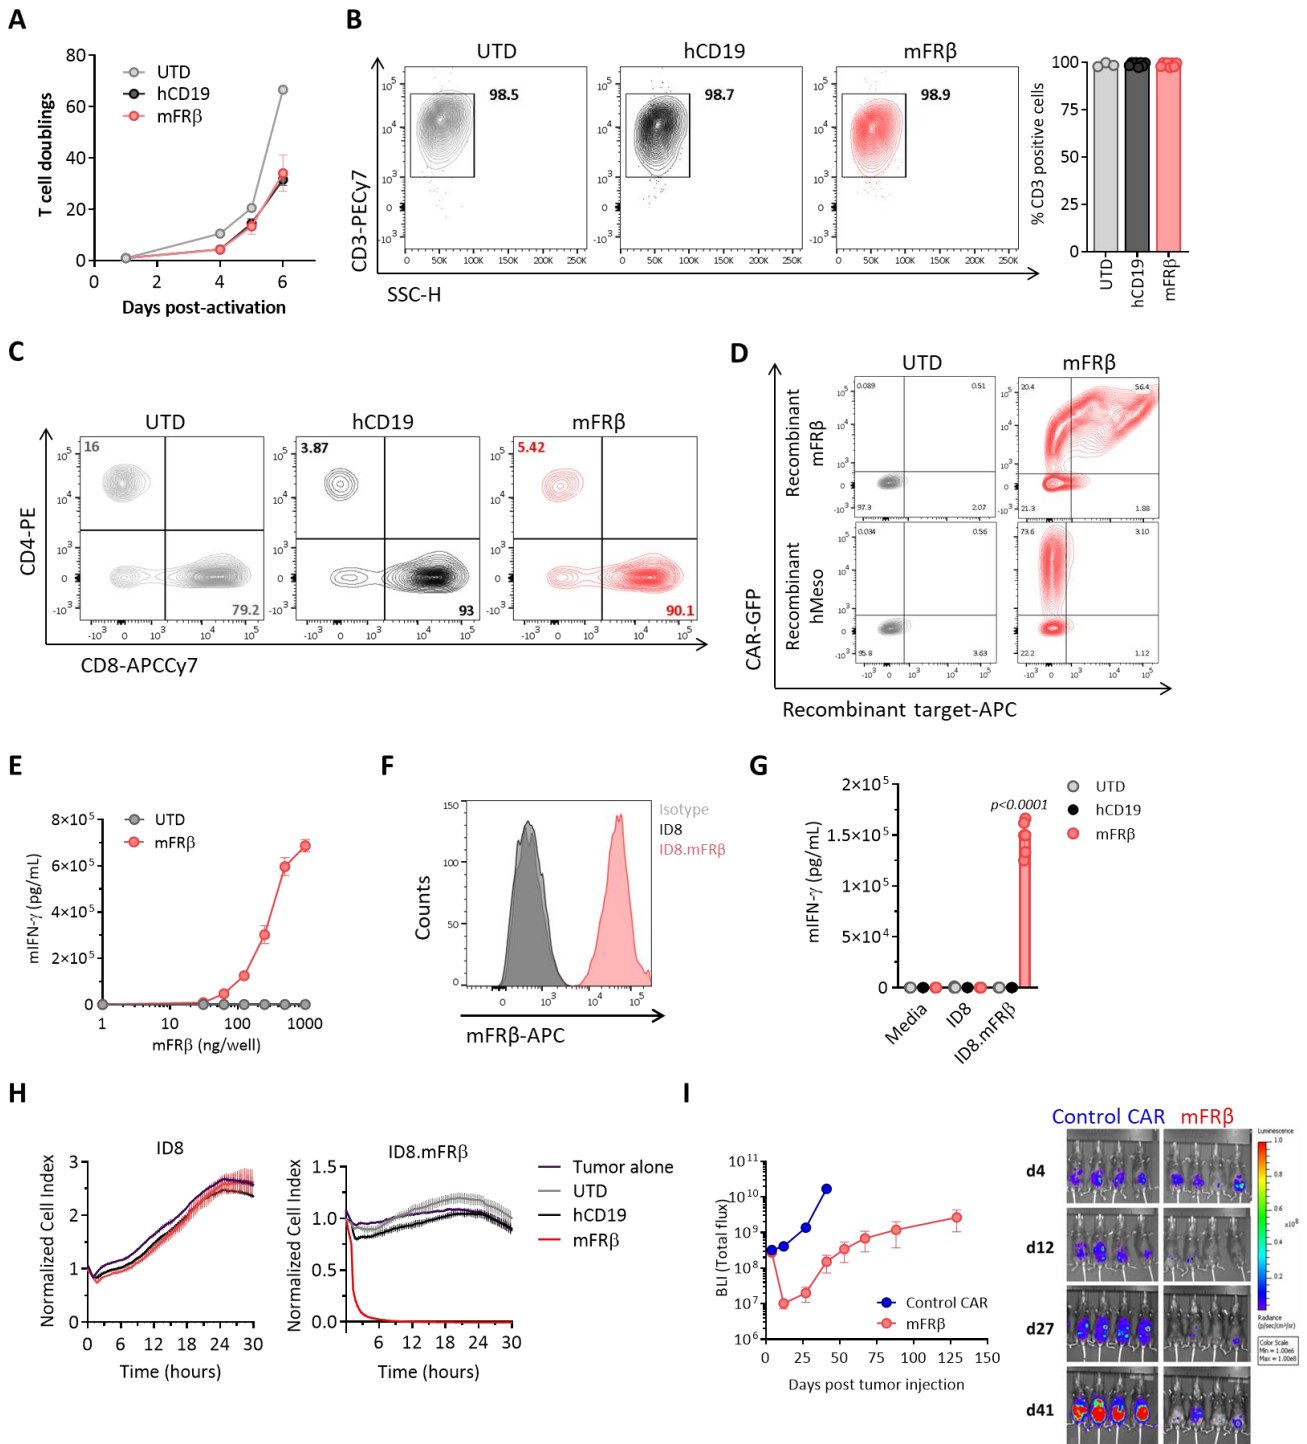

**Supplementary Figure 6. Mouse FR $\beta$  CAR-T cells show antigen-specific reactivity in an engineered CAR-targetable tumor model.** (A) T cell expansion of untransduced (UTD), hCD19 and mFR $\beta$  mouse CAR-T cells. Mean  $\pm$  SD (n=3 independent expansions) is shown. (B) CD3 expression (Y-axis) on expanded UTD or hCD19 and mFR $\beta$  mouse CAR-T cells. Representative flow plots (left panel) and mean  $\pm$  SD (right panel, UTD n=3, hCD19 and mFR $\beta$  n=8) are shown. Each dot represents an independent expansion. (C) CD8 (X-axis) versus CD4 (Y-axis) expression on CD3<sup>+</sup> T cells at day 5 of expansion. Representative flow plots are shown.

**(D)** mFR $\beta$  mouse CAR-T cells or UTD T cells were incubated in the presence of biotinylated recombinant mFR $\beta$  or biotinylated recombinant hMeso as control and stained with SA-APC to detect antigen binding specificity (Y-axis). Expression of GFP (X-axis) was used as a transduction marker. Representative flow plots are shown. Levels of secreted mIFN- $\gamma$  as detected by ELISA in the supernatants of mFR $\beta$  CAR-T cells stimulated with **(E)** increasing concentrations of immobilized recombinant mFR $\beta$  (n=3 replicates), or **(G)** following overnight co-culture of mouse CAR-T cells and parental or mFR $\beta$ -engineered ID8 target cells (n=6 replicates). Concentration means  $\pm$  SD are represented. *p-values* by a two-way ANOVA with Tukey's multiple comparison test are indicated. **(F)** Expression of mFR $\beta$  in ID8.mFR $\beta$  cells as detected by flow cytometry. Representative histogram is shown (grey-isotype, black-ID8, red-ID8.mFR $\beta$ ). **(H)** Real time cytotoxicity assays in ID8 (left panel) and ID8.mFR $\beta$  (right panel) target cells performed using xCelligence technology. Co-cultures were established at a 1:1 E:T ratio. Mean  $\pm$  SD of triplicates is represented. Representative of at least five independent experiments. **(I)** C57BL/6 mice were implanted i.p. with  $5 \times 10^6$  ID8.mFR $\beta$ -RFPfLuc tumor cells and treated with  $5 \times 10^6$  mFR $\beta$  or control CAR $^+$  T cells on days 4, 10, 17, 31, and 38 following tumor injection. Tumor progression was monitored by bioluminescent imaging. Error bars represent mean  $\pm$  SD (left panel, n=8 per group). Images from representative mice are also shown (right panel). Source data are provided as a Source Data file.

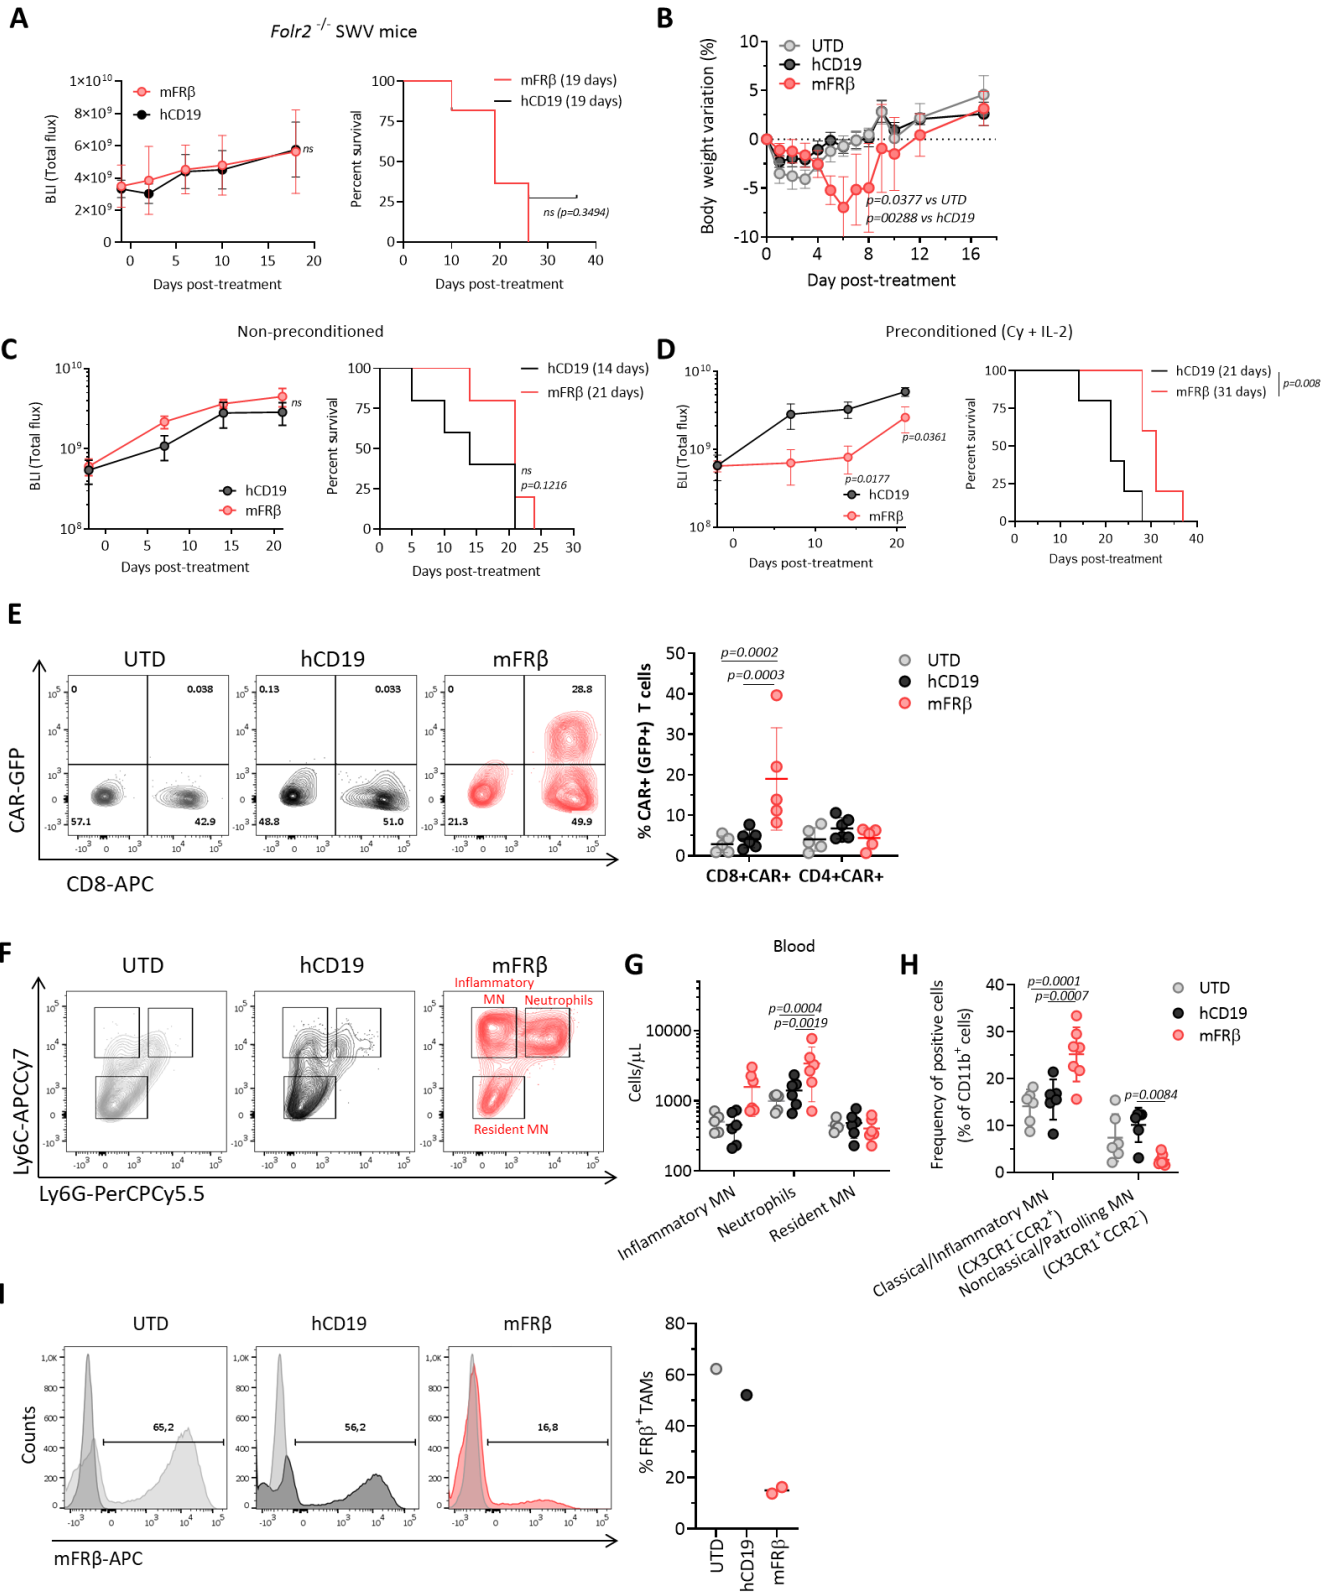

**Supplementary Figure 7. Depletion of FR $\beta$ <sup>+</sup> TAMs *in vivo* by mouse FR $\beta$  CAR-T cells reeducates the TME.** (A) SWV *Folr2*<sup>-/-</sup> mice were inoculated i.p. with 5x10<sup>6</sup> ID8 RFP-fLuc ovarian cancer cells. 21 days later, mice were treated with a single i.p. dose of 8x10<sup>6</sup> mouse CAR<sup>+</sup> T cells preceded by an i.p. injection of 150mg/kg of cyclophosphamide (Cy) 24 hours before T cell administration, and accompanied by i.p. injections of 15 $\mu$ g of IL-2 on three consecutive days. Tumor progression as monitored by bioluminescence imaging (BLI, left panel) as mean radiance  $\pm$  SEM and Kaplan-Meier survival curves (right panel) (n=11 per group). (B-H) C57BL/6 mice were inoculated i.p. with 5x10<sup>6</sup> ID8 RFP-fLuc ovarian cancer cells. 21 days later, mice were treated with a single i.p. dose of 8x10<sup>6</sup> mouse CAR<sup>+</sup> T cells preceded by an i.p. injection of 150mg/kg of cyclophosphamide (Cy) 24 hours before T cell administration, and accompanied by i.p. injections of 15 $\mu$ g of IL-2 on three consecutive days. Mice were euthanized for analysis at indicated time points or maintained for tumor progression monitoring. (B) Percentage of body weight variation in treated mice following T cell administration. (C) Tumor progression in mice treated with hCD19 or mFR $\beta$  CAR-T cells in the absence of Cy + IL-2 preconditioning. BLI as mean radiance  $\pm$  SEM (left panel) and Kaplan-Meier survival curves (right panel) are shown (n=5 per group). (D) Tumor progression in mice treated with hCD19 or mFR $\beta$  CAR-T cells and preconditioned with Cy + IL-2. BLI as mean radiance  $\pm$  SEM (left panel) and Kaplan-Meier survival curves (right panel) are shown (n=5 per group). (E) Presence of CAR<sup>+</sup>-T cells in the ascites 6 days after treatment. Representative flow plots showing CAR<sup>+</sup> cells as detected by GFP (Y-axis) and CD8 (X-axis) expression. Cells were previously gated on live/CD45<sup>+</sup>/CD3<sup>+</sup> (left panel). Mean frequencies of CAR<sup>+</sup> T cells  $\pm$  SD (n=5 mice per group) are shown (right panel). (F) Phenotype of myeloid cells in the ascites of treated mice 6 days after T cell administration, based on Ly6C (Y-axis) and Ly6G (X-axis) expression. Representative flow plots showing the gating strategy for myeloid cell subsets (gated on live, CD45<sup>+</sup>CD11b<sup>+</sup>) including resident monocytes (Ly6C<sup>-</sup>Ly6G<sup>-</sup>), inflammatory monocytes (Ly6C<sup>+</sup>Ly6G<sup>-</sup>) and neutrophils (Ly6C<sup>int</sup>Ly6G<sup>+</sup>). (G) Concentration of different myeloid cell populations (as described in Fig. S7C) in the blood of mice 10 days after T cell administration. Mean  $\pm$  SD are represented (UTD n=5 mice, hCD19 and mFR $\beta$  n=6 mice). (H) Frequencies of myeloid cell subsets based on CCR2 and CX3CR1 expression (pregated on live, CD45<sup>+</sup>CD11b<sup>+</sup>) including classical/inflammatory monocytes (CX3CR1<sup>+</sup>CCR2<sup>+</sup>) and nonclassical/patrolling monocytes (CX3CR1<sup>+</sup>CCR2<sup>-</sup>) in ascites 6 days after T cell administration (UTD and hCD19 n=6 mice, mFR $\beta$  n=7 mice). (I) mFR $\beta$  expression in peritoneal TAMs collected 8 days after CAR T cell treatment from experiment in *Cd8* KO mice shown in Fig. 5N. Histograms (left panel) and frequencies of FR $\beta$ <sup>+</sup> TAMs (pregated as live, CD45<sup>+</sup>CD11b<sup>+</sup>F4/80<sup>+</sup>, right panel) are shown (UTD, hCD19 n=1 mouse, mFR $\beta$  n=2 mice). *p-values* by a (B, E, G, H) two-way ANOVA with Tukey's multiple comparison test, a (A, C, D (left panel)) two-tailed multiple t-test, or a (A, C, D (right panel)) two-sided Log-rank Mantel-Cox test are indicated. *ns*, non-significant; MN, monocytes. Source data are provided as a Source Data file.

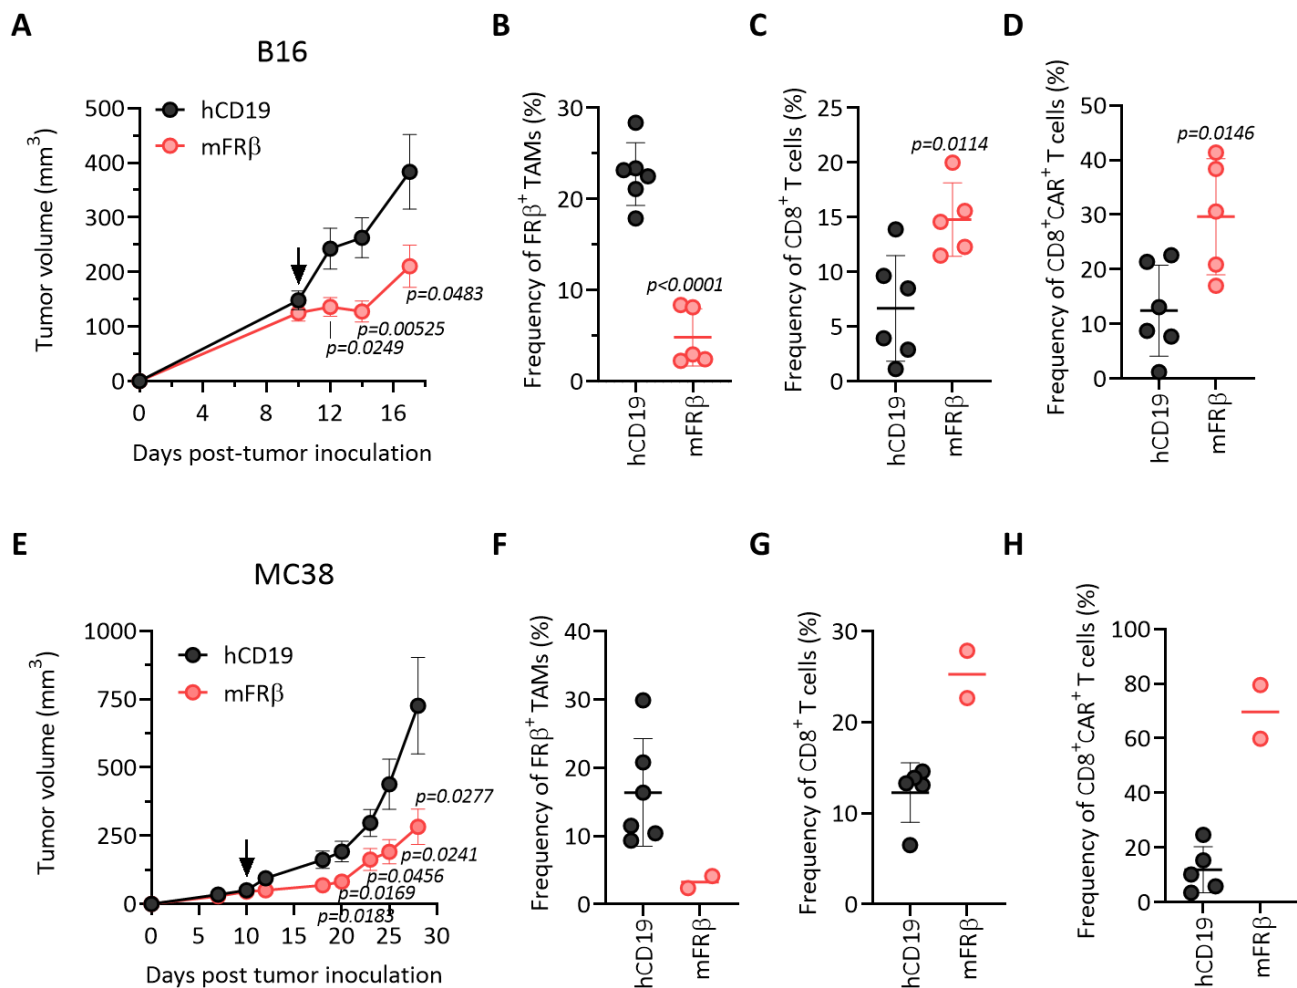

**Supplementary Figure 8. Depletion of FRβ<sup>+</sup> TAMs by mouse FRβ CAR-T cells *in vivo* delays tumor growth and increases T cell infiltration in different solid tumor models.** C57BL/6 mice were inoculated s.c. with 0.25x10<sup>6</sup> B16 melanoma or 0.5x10<sup>6</sup> MC38 colon adenocarcinoma cells. 10 days later, mice were randomized in groups and treated with a single i.v. dose of 8x10<sup>6</sup> mouse CAR<sup>+</sup>T cells preceded by an i.p. injection of 150mg/kg of cyclophosphamide (Cy) 24 hours before T cell administration, and accompanied by i.p. injections of 15μg of IL-2 on three consecutive days. Mice were monitored for tumor progression by caliper measurement. Arrows indicate time of treatment. Tumor volumes are represented for (A) B16 or (E) MC38 *in vivo* models. Data is represented as mean ± SEM (B16: hCD19 n=13, mFRβ n=11 tumors per group; MC38 n=12 tumors per group). Frequencies of intratumoral (B, F) FRβ<sup>+</sup> TAMs (defined as live, CD45<sup>+</sup>CD11b<sup>+</sup>F4/80<sup>+</sup> cells), (C, G) CD8<sup>+</sup> T cells (pregated on live, CD45<sup>+</sup>) and (D, H) CD8<sup>+</sup>CAR<sup>+</sup> T cells (defined as live, CD45<sup>+</sup>CD8<sup>+</sup>GFP<sup>+</sup>) in mechanically dissociated tumors collected 7 days after CAR-T cell treatment are shown as mean ± SD for n>3. (B-D) hCD19 n=6, mFRβ n=5 tumors per group. (F-H) hCD19 n=5, mFRβ n=2 tumors per group. *p*-values by unpaired two-tailed multiple student's t-test are indicated. Source data are provided as a Source Data file.

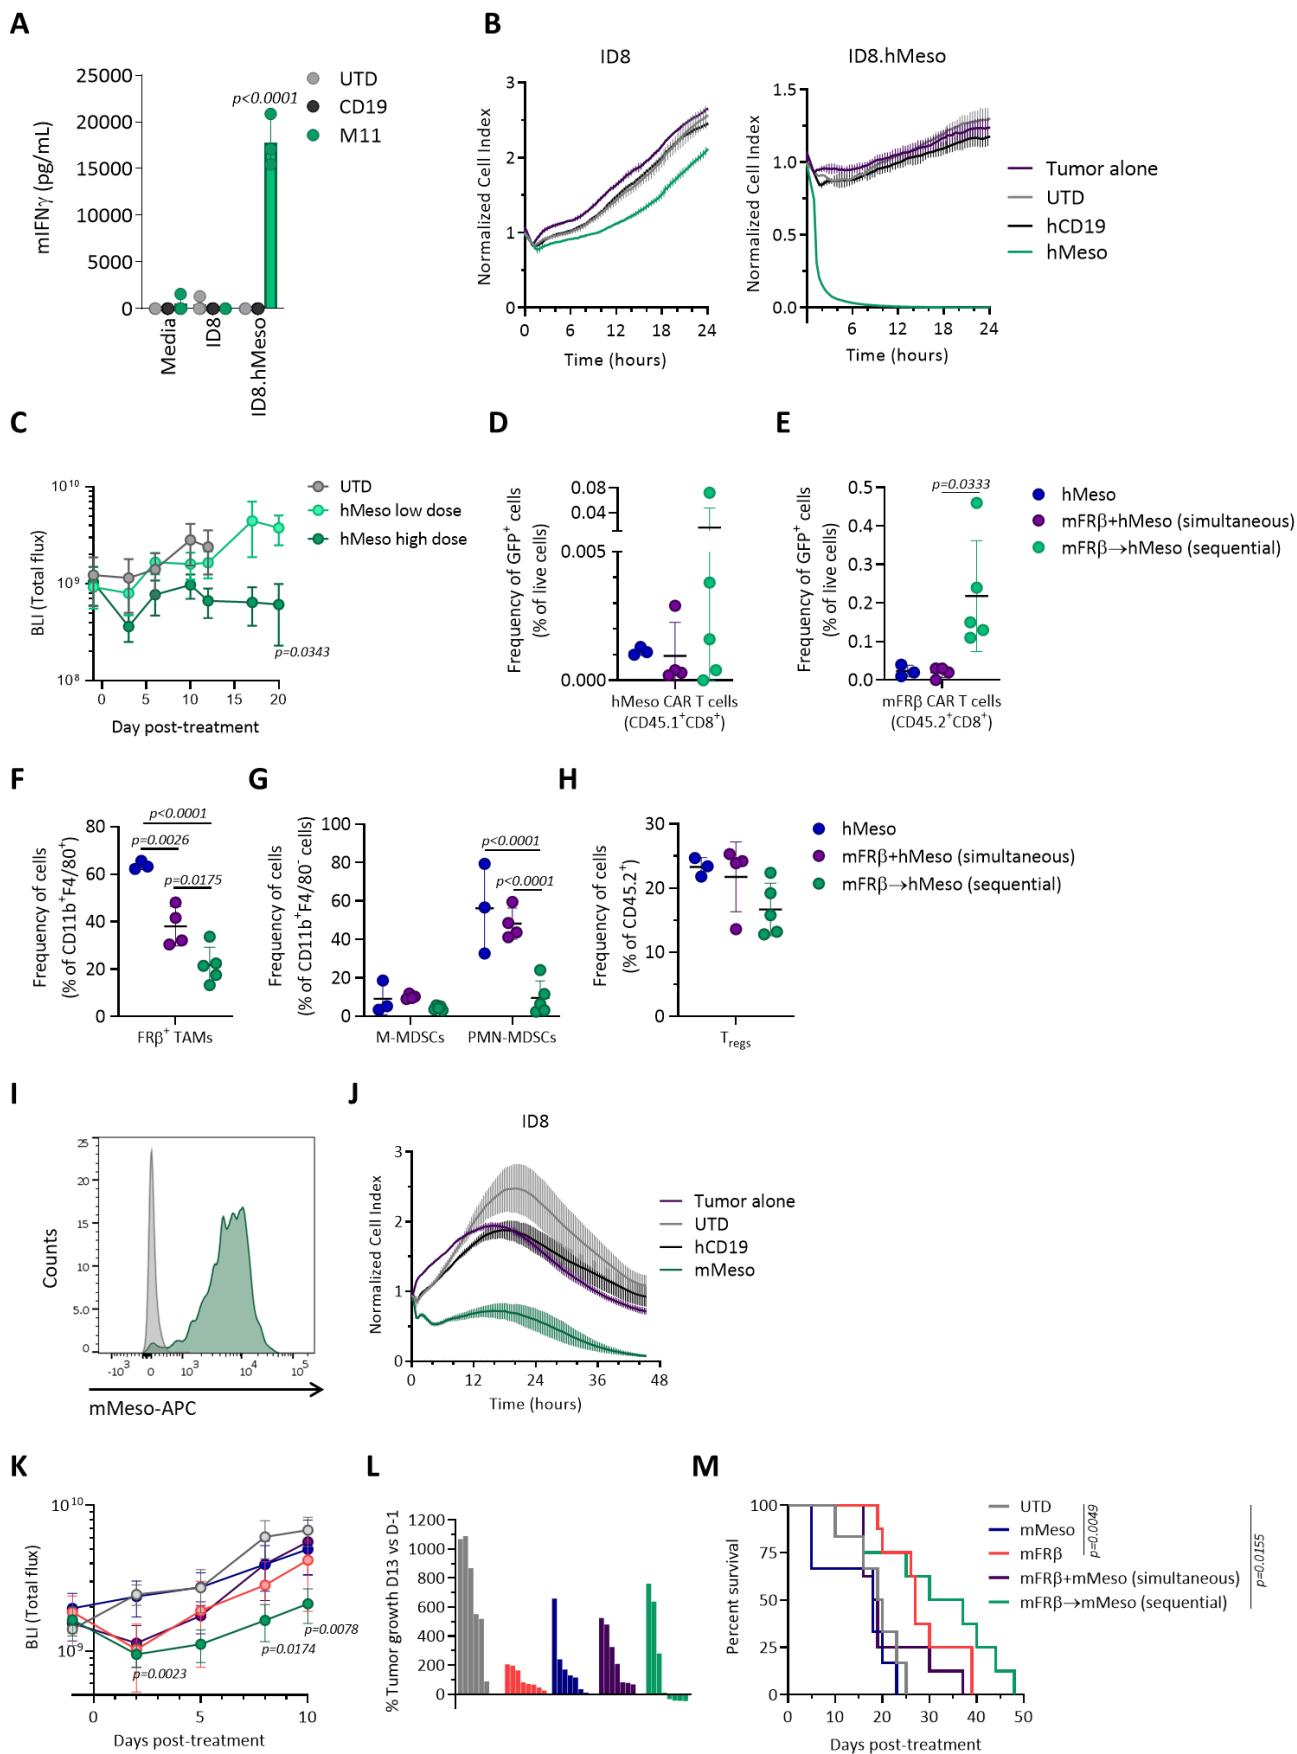

**Supplementary Figure 9. Human mesothelin and mouse mesothelin specific CAR-T cells display antigen-specific reactivity *in vitro* and improved performance *in vivo* when given after preconditioning the TME with mouse FR $\beta$  CAR-T cells.** (A) Levels of secreted mIFN- $\gamma$  as detected by ELISA in the supernatants of hMeso CAR-T cells following overnight co-culture with parental or hMeso-engineered ID8 target cells. Co-cultures were established at a 1:1 E:T ratio. Mean  $\pm$  SD of triplicates is represented. (B) Real time cytotoxicity assays of hMeso CAR-T cells against ID8 (left panel) and ID8.hMeso (right panel) cells at 1:1 E:T ratio performed using xCelligence technology. Mean  $\pm$  SD of triplicates is represented. (C) C57BL/6 mice were inoculated i.p. with  $5 \times 10^6$  ID8.hMeso-RFP-fLuc ovarian cancer cells. 21 days later, mice were treated with a single i.p. dose of  $4 \times 10^6$  (low dose) or  $8 \times 10^6$  (high dose) hMeso mouse CAR $^+$  T cells, or  $8 \times 10^6$  UTD T cells, accompanied by Cy+IL-2 preconditioning as indicated. Tumor progression as monitored by BLI is shown as mean radiance  $\pm$  SEM (UTD n=3 mice, low dose n=4 mice, high dose n=5 mice). Frequency of (D) hMeso CAR $^+$  T cells (CD45.1 $^+$ GFP $^+$ ) or (E) mFR $\beta$  CAR $^+$  T cells (CD45.2 $^+$ GFP $^+$ ) in the peritoneal cavity of mice from the study depicted in **Fig. 6A** at the endpoint (day 56 post-administration for hMeso and mFR $\beta$ +hMeso groups and day 69 for mFR $\beta$  $\rightarrow$ hMeso). Frequencies of (F) FR $\beta^+$  TAMs (G) MDSCs (M-MDSCs: Ly6C $^+$ Ly6G $^-$ , PMN-MDSCs: Ly6C $^{int}$ Ly6G $^+$ ) and (H) Tregs (CD4 $^+$ CD25 $^+$ ) in the peritoneal cavity of mice from the study depicted in **Fig. 6A** at the endpoint. (D-H) Means  $\pm$  SD (hMeso n=3 mice, mFR $\beta$ +hMeso n=4 mice, mFR $\beta$  $\rightarrow$ hMeso n=5 mice) are represented. (I) Endogenous levels of mouse mesothelin expression in parental ID8 cells as detected by flow cytometry. Representative histogram (grey-isotype, green-mMeso) is shown. (J) Real time cytotoxicity assays of mMeso CAR-T cells against ID8 target cells at 10:1 E:T ratio performed using xCelligence technology. Mean  $\pm$  SD of triplicates is represented. (K-M) C57BL/6 mice were inoculated i.p. with  $5 \times 10^6$  ID8 RFP-fLuc ovarian cancer cells. 21 days later, mice were treated with a single i.p. dose of  $4 \times 10^6$  hCD19, mFR $\beta$  or mMeso mouse CAR $^+$  T cells, or a combination of  $4 \times 10^6$  mFR $\beta$  and  $4 \times 10^6$  mMeso CAR $^+$  T cells given simultaneously or sequentially (on day 0 and day 3, respectively). Mice from groups treated with a single CAR received an equivalent dose of UTD T cells to even up the dose of treatment combination groups. T cell administration was preceded by an i.p. injection of 150mg/kg of cyclophosphamide (Cy) 24 hours earlier, and accompanied by i.p. injections of 15 $\mu$ g of IL-2 on three consecutive days. (K) Tumor progression as monitored by bioluminescence imaging is represented as mean radiance  $\pm$  SEM is represented. (L) Waterfall plot showing the change in tumor bioluminescence on day 13 versus baseline. Data from individual mice are represented. (M) Kaplan-Meier survival curves are represented. Endpoint was defined at animal body weight increase higher than 10% due to ascites formation. (K, L, M) Data represented for: UTD, hCD19, and hMeso n=6 mice; mFR $\beta$ , mFR $\beta$ +mMeso and mFR $\beta$  $\rightarrow$ mMeso n=8 mice. *p-values* by a (A, D-H) one-way ANOVA with Tukey's multiple comparison test, by a (C) two-tailed multiple t-test as compared to hMeso low dose, by a (K) two-tailed multiple t-test as compared to UTD or by a (M) two-sided Log-rank Mantel-Cox test are indicated. Source data are provided as a Source Data file.



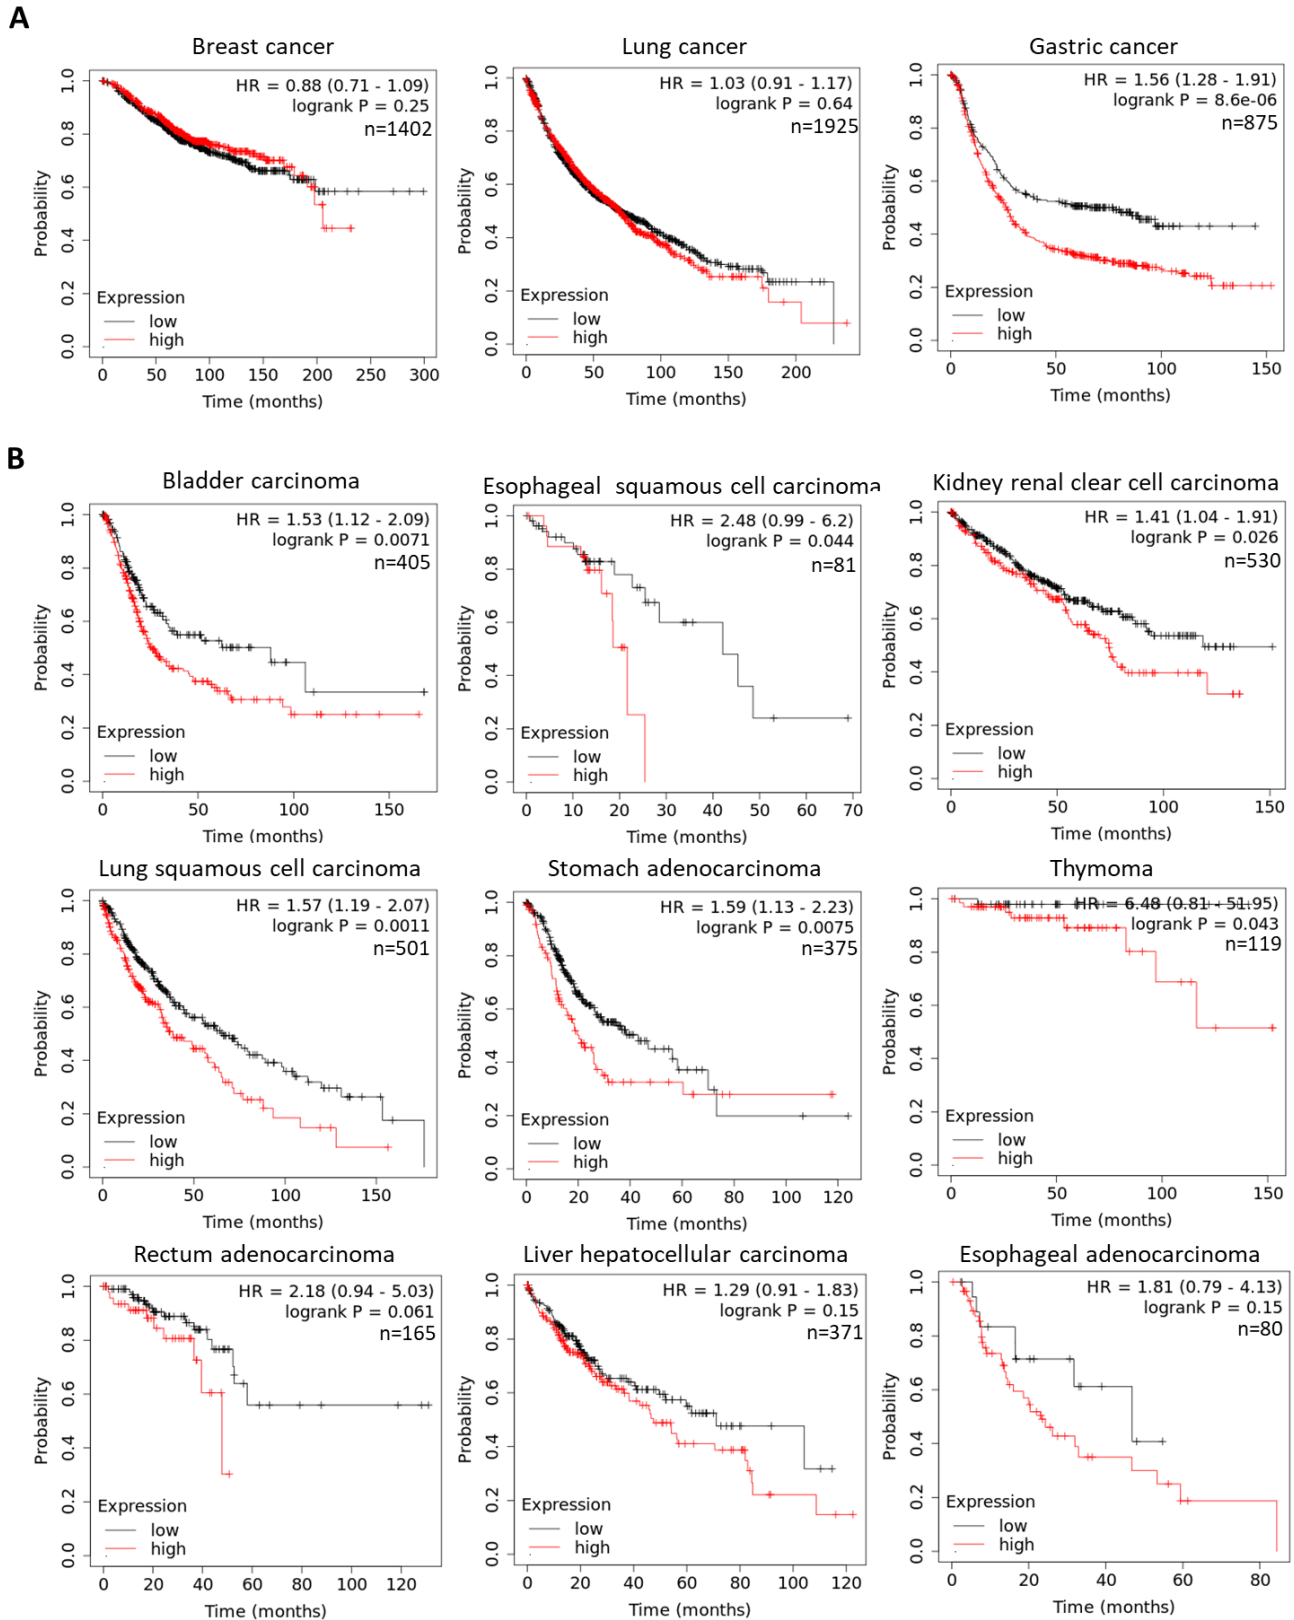

**Supplementary Figure 10. Correlation of FR $\beta$  expression and survival in different human cancer types.** (A) Overall survival curves for breast, lung and gastric cancer patients with high (red) or low (black) expression of FOLR2 (gene encoding for FR $\beta$ ). The clinical outcome data

and the mRNA gene chip expression data was retrieved from the Kaplan-Meier plotter database. **(B)** Overall survival curves for patients with indicated cancer types with high (red) or low (black) expression of FOLR2 (gene encoding for FR $\beta$ ). The clinical outcome data and the mRNA RNA seq gene expression data was retrieved from the Kaplan-Meier plotter database. N indicates number of patients included in the analysis for each stage. The Hazard Ratios (HR) and *p-values* by a two-sided Log-rank Mantel-Cox test are indicated.
