# Supplementary material for: CAR-T cell-mediated depletion of immunosuppressive tumor-associated macrophages promotes endogenous antitumor immunity and augments adoptive immunotherapy
Source: PubMed Central journal article supplement (PMC7873057; doi:10.1038/s41467-021-20893-2), 2021-02-09
Supplement: 41467_2021_20893_MOESM3_ESM.pdf [file 41467_2021_20893_MOESM3_ESM.pdf]

## **Descriptions of Additional Supplementary Files**

### **Supplementary Data 1**

**Description:** List of differentially expressed genes in FR $\beta$ + TAMs as compared to FR $\beta$  – TAMs as measured by RNAseq (n=4 per group). Adjusted p-value < 0.1 were considered.
